# Supplementary material for: Recovering Tomato Landraces to Simultaneously Improve Fruit Yield and Nutritional Quality Against Salt Stress
Source: PubMed Central journal article supplement (PMC6284034; doi:10.3389/fpls.2018.01778), 2018-11-30
Supplement: Table_1.pdf [file Table_1.pdf]

**Supplementary Table S1.** Average values of principal factors (genotype and condition) and *p*-values for these factors and their interaction for each parameter analyzed in figures 1B, 2 and 3.

Effect of the genotype and salt stress condition on fruit number, fruit weight and fruit water content (corresponding to results in fig. 1B).

|               |                 | Fruit number / plant | Fruit weight       | Fruit water content |
|---------------|-----------------|----------------------|--------------------|---------------------|
| Genotype (G)  | Moneymaker      | 26.53 <sup>b</sup>   | 43.42 <sup>b</sup> | 93.04 <sup>a</sup>  |
|               | Negro Yeste     | 37.50 <sup>a</sup>   | 16.70 <sup>c</sup> | 91.94 <sup>b</sup>  |
|               | Verdal          | 17.52 <sup>c</sup>   | 65.53 <sup>a</sup> | 93.04 <sup>a</sup>  |
|               | <i>P</i> -Value | ***                  | ***                | **                  |
| Condition (C) | Control         | 30.16 <sup>a</sup>   | 57.41 <sup>a</sup> | 93.28 <sup>a</sup>  |
|               | Salt Stress     | 24.21 <sup>b</sup>   | 26.28 <sup>b</sup> | 92.06 <sup>b</sup>  |
|               | <i>P</i> -Value | ***                  | ***                | ***                 |
| Interaction   | G x C           | ***                  | ***                | *                   |

Effect of the genotype and salt stress condition on total soluble solids (TSS) and color evaluation expresses as a\*/b\* ratio (corresponding to results in fig. 2).

|               |                 | GREEN FRUIT       |                    | RIPE FRUIT        |                    |
|---------------|-----------------|-------------------|--------------------|-------------------|--------------------|
|               |                 | TSS               | a*/b*              | TSS               | a*/b*              |
| Genotype (G)  | Moneymaker      | 4.64 <sup>b</sup> | -0.60 <sup>a</sup> | 5.70 <sup>c</sup> | 0.82 <sup>a</sup>  |
|               | Negro Yeste     | 5.54 <sup>a</sup> | -0.68 <sup>b</sup> | 7.18 <sup>a</sup> | 0.55 <sup>b</sup>  |
|               | Verdal          | 5.34 <sup>a</sup> | -0.67 <sup>b</sup> | 6.90 <sup>b</sup> | -0.40 <sup>c</sup> |
|               | <i>P</i> -Value | ***               | ***                | ***               | ***                |
| Condition (C) | Control         | 4.58 <sup>b</sup> | -0.64              | 5.12 <sup>b</sup> | 0.32               |
|               | Salt Stress     | 5.77 <sup>a</sup> | -0.66              | 8.07 <sup>a</sup> | 0.34               |
|               | <i>P</i> -Value | ***               | n.s.               | ***               | n.s.               |
| Interaction   | G x C           | *                 | *                  | ***               | *                  |

Effect of the genotype and salt stress condition on total chlorophylls and carotenoids contents in leaf, green and ripe fruits (corresponding to results in fig. 3).

|               |                 | LEAF                                 |                                     | GREEN FRUIT        |                   | RIPE FRUIT         |                     |
|---------------|-----------------|--------------------------------------|-------------------------------------|--------------------|-------------------|--------------------|---------------------|
|               |                 | Chlorophylls (mg g <sup>-1</sup> fw) | Carotenoids (mg g <sup>-1</sup> fw) | Chlorophylls       | Carotenoids       | Chlorophylls       | Carotenoids         |
| Genotype (G)  | Moneymaker      | 2.08 <sup>a</sup>                    | 0.29 <sup>a</sup>                   | 23.08 <sup>c</sup> | 4.97 <sup>c</sup> | n.d. <sup>c</sup>  | 73.25 <sup>b</sup>  |
|               | Negro Yeste     | 1.75 <sup>c</sup>                    | 0.26 <sup>b</sup>                   | 51.44 <sup>a</sup> | 9.83 <sup>a</sup> | 27.89 <sup>a</sup> | 140.05 <sup>a</sup> |
|               | Verdal          | 1.96 <sup>b</sup>                    | 0.28 <sup>a,b</sup>                 | 43.76 <sup>b</sup> | 8.25 <sup>b</sup> | 20.96 <sup>b</sup> | 5.27 <sup>c</sup>   |
|               | <i>P</i> -Value | ***                                  | ***                                 | ***                | ***               | ***                | ***                 |
| Condition (C) | Control         | 1.93                                 | 0.27 <sup>b</sup>                   | 29.60 <sup>b</sup> | 5.54 <sup>b</sup> | 12.44 <sup>b</sup> | 62.37 <sup>b</sup>  |
|               | Salt Stress     | 1.94                                 | 0.28 <sup>a</sup>                   | 49.26 <sup>a</sup> | 9.83 <sup>a</sup> | 20.12 <sup>a</sup> | 83.35 <sup>a</sup>  |
|               | <i>P</i> -Value | n.s.                                 | **                                  | ***                | ***               | ***                | ***                 |
| Interaction   | G x C           | *                                    | *                                   | ***                | ***               | **                 | *                   |

Pigments contents are presented as µg g<sup>-1</sup> fresh weigh (fw) unless otherwise stated in the table. Different letters in each principal factor indicate statistically significant differences at *P* < 0.05 (Tukey's test). \*, \*\* and \*\*\* indicates significant differences at *P* ≤ 0.05, *P* ≤ 0.01 and *P* ≤ 0.001 respectively for each main factor and the interaction. n.s. = no significance.
