# Supplementary material for: Recovering Tomato Landraces to Simultaneously Improve Fruit Yield and Nutritional Quality Against Salt Stress
Source: PubMed Central journal article supplement (PMC6284034; doi:10.3389/fpls.2018.01778), 2018-11-30
Supplement: Table_2.pdf [file Table_2.pdf]

**Supplementary Table S2.** Average values of principal factors (genotype and condition) and *p*-values for these factors and their interaction for each parameter analyzed in tables 1 and 2.

Effect of the genotype and salt stress condition on the contents of Na<sup>+</sup>, K<sup>+</sup> and Ca<sup>2+</sup> cations and K<sup>+</sup>/Na<sup>+</sup> and Ca<sup>2+</sup>/Na<sup>+</sup> ratio values in leaf, green and ripe fruit (corresponding to results in table 1).

| <b>LEAF</b>        |                 | Na <sup>+</sup>     | K <sup>+</sup>    | Ca <sup>2+</sup>   | K <sup>+</sup> /Na <sup>+</sup> | Ca <sup>2+</sup> /Na <sup>+</sup> |
|--------------------|-----------------|---------------------|-------------------|--------------------|---------------------------------|-----------------------------------|
| Genotype (G)       | Moneymaker      | 822 <sup>a</sup>    | 1983 <sup>b</sup> | 3153 <sup>b</sup>  | 6.60 <sup>c</sup>               | 8.05 <sup>c</sup>                 |
|                    | Negro Yeste     | 520 <sup>b</sup>    | 1831 <sup>b</sup> | 3888 <sup>a</sup>  | 9.15 <sup>b</sup>               | 18.04 <sup>a</sup>                |
|                    | Verdal          | 319 <sup>c</sup>    | 3251 <sup>a</sup> | 3063 <sup>b</sup>  | 17.92 <sup>a</sup>              | 15.04 <sup>b</sup>                |
|                    | <i>P</i> -Value | ***                 | ***               | ***                | ***                             | ***                               |
| Condition (C)      | Control         | 159 <sup>b</sup>    | 2884 <sup>a</sup> | 3400               | 19.81 <sup>a</sup>              | 23.28 <sup>a</sup>                |
|                    | Salt Stress     | 949 <sup>a</sup>    | 1825 <sup>b</sup> | 3336               | 2.63 <sup>b</sup>               | 4.15 <sup>b</sup>                 |
|                    | <i>P</i> -Value | ***                 | ***               | n.s.               | ***                             | ***                               |
| Interaction        | G x C           | ***                 | ***               | *                  | ***                             | ***                               |
| <b>GREEN FRUIT</b> |                 |                     |                   |                    |                                 |                                   |
| Genotype (G)       | Moneymaker      | 156.10 <sup>a</sup> | 3736              | 55.09 <sup>b</sup> | 42.86 <sup>b</sup>              | 0.86 <sup>b</sup>                 |
|                    | Negro Yeste     | 107.11 <sup>b</sup> | 3523              | 46.66 <sup>b</sup> | 56.83 <sup>a</sup>              | 0.80 <sup>b</sup>                 |
|                    | Verdal          | 118.97 <sup>b</sup> | 3807              | 85.90 <sup>a</sup> | 62.35 <sup>a</sup>              | 1.72 <sup>a</sup>                 |
|                    | <i>P</i> -Value | ***                 | n.s.              | ***                | **                              | ***                               |
| Condition (C)      | Control         | 35.90 <sup>b</sup>  | 3038 <sup>b</sup> | 67.96              | 87.76 <sup>a</sup>              | 1.98 <sup>a</sup>                 |
|                    | Salt Stress     | 218.88 <sup>a</sup> | 4339 <sup>a</sup> | 57.14              | 20.27 <sup>b</sup>              | 0.27 <sup>b</sup>                 |
|                    | <i>P</i> -Value | ***                 | ***               | n.s.               | ***                             | ***                               |
| Interaction        | G x C           | ***                 | *                 | *                  | *                               | **                                |
| <b>RIPE FRUIT</b>  |                 |                     |                   |                    |                                 |                                   |
| Genotype (G)       | Moneymaker      | 85.05 <sup>a</sup>  | 2755              | 33.25 <sup>b</sup> | 59.91 <sup>a,b</sup>            | 0.786 <sup>b</sup>                |
|                    | Negro Yeste     | 80.35 <sup>a</sup>  | 2763              | 39.64 <sup>b</sup> | 51.25 <sup>b</sup>              | 0.855 <sup>b</sup>                |
|                    | Verdal          | 63.34 <sup>b</sup>  | 2567              | 64.85 <sup>a</sup> | 69.01 <sup>a</sup>              | 1.943 <sup>a</sup>                |
|                    | <i>P</i> -Value | **                  | n.s.              | ***                | **                              | ***                               |
| Condition (C)      | Control         | 27.81 <sup>b</sup>  | 2653              | 54.33 <sup>a</sup> | 97.97 <sup>a</sup>              | 2.07 <sup>a</sup>                 |
|                    | Salt Stress     | 124.68 <sup>a</sup> | 2736              | 37.50 <sup>b</sup> | 22.14 <sup>b</sup>              | 0.32 <sup>b</sup>                 |
|                    | <i>P</i> -Value | ***                 | n.s.              | ***                | ***                             | ***                               |
| Interaction        | G x C           | **                  | n.s.              | ***                | *                               | ***                               |

Cation contents are presented as µg g<sup>-1</sup> fresh weigh. Different letters in each principal factor indicate statistically significant differences at *P* < 0.05 (Tukey's test). \*, \*\* and \*\*\* indicates significant differences at *P* ≤ 0.05, *P* ≤ 0.01 and *P* ≤ 0.001 respectively for each principal factor and the interaction. n.s. = no significance.

Effect of the genotype and salt stress condition on metabolites contents in leaf of commercial cv. Moneymaker and traditional varieties Negro Yeste and Verdal (corresponding to results in table 2).

| A             |                 | Sucrose<br>(mg g <sup>-1</sup> fw) | Fructose<br>(mg g <sup>-1</sup> fw) | Glucose<br>(mg g <sup>-1</sup> fw) | Raffinose<br>(mg g <sup>-1</sup> fw) | Citrate            | Succinate         |
|---------------|-----------------|------------------------------------|-------------------------------------|------------------------------------|--------------------------------------|--------------------|-------------------|
| Genotype (G)  | Moneymaker      | 0.47 <sup>b</sup>                  | 0.42 <sup>b</sup>                   | 0.23 <sup>b</sup>                  | 0.34                                 | 39.52 <sup>b</sup> | 2.70 <sup>c</sup> |
|               | Negro Yeste     | 0.64 <sup>a</sup>                  | 0.71 <sup>a</sup>                   | 0.43 <sup>a</sup>                  | 0.28                                 | 46.92 <sup>a</sup> | 4.71 <sup>b</sup> |
|               | Verdal          | 0.46 <sup>b</sup>                  | 0.66 <sup>a</sup>                   | 0.41 <sup>a</sup>                  | 0.32                                 | 35.82 <sup>b</sup> | 7.63 <sup>a</sup> |
|               | <i>P</i> -Value | ***                                | ***                                 | ***                                | n.s.                                 | **                 | ***               |
| Condition (C) | Control         | 0.51                               | 0.63 <sup>a</sup>                   | 0.39 <sup>a</sup>                  | 0.34                                 | 47.12 <sup>a</sup> | 4.25 <sup>b</sup> |
|               | Salt Stress     | 0.53                               | 0.56 <sup>b</sup>                   | 0.32 <sup>b</sup>                  | 0.28                                 | 34.39 <sup>b</sup> | 5.78 <sup>a</sup> |
|               | <i>P</i> -Value | n.s.                               | **                                  | ***                                | n.s.                                 | ***                | *                 |
| Interaction   | G x C           | *                                  | *                                   | *                                  | **                                   | ***                | *                 |

| B             |                 | Fumarate | Malate             | Formate           | Glutamate           | Formate /<br>succinate | Glutamate /<br>succinate |
|---------------|-----------------|----------|--------------------|-------------------|---------------------|------------------------|--------------------------|
| Genotype (G)  | Moneymaker      | 1.08     | 69.07 <sup>a</sup> | 7.22 <sup>a</sup> | 93.70 <sup>b</sup>  | 2.76 <sup>a</sup>      | 36.80 <sup>a</sup>       |
|               | Negro Yeste     | 1.09     | 69.73 <sup>a</sup> | 3.92 <sup>c</sup> | 87.61 <sup>b</sup>  | 1.34 <sup>b</sup>      | 22.56 <sup>b</sup>       |
|               | Verdal          | 0.94     | 60.86 <sup>b</sup> | 5.53 <sup>b</sup> | 177.52 <sup>a</sup> | 0.77 <sup>b</sup>      | 23.94 <sup>b</sup>       |
|               | <i>P</i> -Value | n.s.     | *                  | ***               | ***                 | ***                    | **                       |
| Condition (C) | Control         | 0.99     | 65.86              | 7.76 <sup>a</sup> | 94.58 <sup>b</sup>  | 2.24 <sup>a</sup>      | 25.44                    |
|               | Salt Stress     | 1.08     | 67.25              | 3.35 <sup>b</sup> | 144.64 <sup>a</sup> | 1.01 <sup>b</sup>      | 30.09                    |
|               | <i>P</i> -Value | n.s.     | n.s.               | ***               | ***                 | ***                    | n.s.                     |
| Interaction   | G x C           | n.s.     | ***                | ***               | ***                 | **                     | **                       |

| C             |                 | β-carotene         | Violaxanthin       | Neoxanthin        | Lutein             |
|---------------|-----------------|--------------------|--------------------|-------------------|--------------------|
| Genotype (G)  | Moneymaker      | 26.45 <sup>a</sup> | 10.51 <sup>a</sup> | 8.64 <sup>a</sup> | 17.98 <sup>b</sup> |
|               | Negro Yeste     | 19.63 <sup>b</sup> | 5.88 <sup>b</sup>  | 5.56 <sup>b</sup> | 13.33 <sup>c</sup> |
|               | Verdal          | 28.75 <sup>a</sup> | 8.88 <sup>a</sup>  | 8.32 <sup>a</sup> | 22.45 <sup>a</sup> |
|               | <i>P</i> -Value | ***                | ***                | ***               | ***                |
| Condition (C) | Control         | 25.51              | 9.87 <sup>a</sup>  | 7.83              | 17.98              |
|               | Salt Stress     | 24.38              | 6.98 <sup>b</sup>  | 7.18              | 17.86              |
|               | <i>P</i> -Value | n.s.               | **                 | n.s.              | n.s.               |
| Interaction   | G x C           | *                  | *                  | *                 | *                  |

| D             |                 | Chlorophyll a<br>(mg g <sup>-1</sup> fw) | Chlorophyll b<br>(mg g <sup>-1</sup> fw) | Chlorophyll /<br>carotenoid |
|---------------|-----------------|------------------------------------------|------------------------------------------|-----------------------------|
| Genotype (G)  | Moneymaker      | 1.52 <sup>a</sup>                        | 0.57 <sup>a</sup>                        | 7.20 <sup>a</sup>           |
|               | Negro Yeste     | 1.32 <sup>c</sup>                        | 0.44 <sup>b</sup>                        | 6.66 <sup>b</sup>           |
|               | Verdal          | 1.42 <sup>b</sup>                        | 0.54 <sup>a</sup>                        | 7.14 <sup>a</sup>           |
|               | <i>P</i> -Value | ***                                      | ***                                      | **                          |
| Condition (C) | Control         | 1.43                                     | 0.50                                     | 7.21 <sup>a</sup>           |
|               | Salt Stress     | 1.41                                     | 0.53                                     | 6.79 <sup>b</sup>           |
|               | <i>P</i> -Value | n.s.                                     | n.s.                                     | **                          |
| Interaction   | G x C           | *                                        | *                                        | *                           |

Effect of the genotype and salt stress condition on metabolite contents in green fruit of commercial cv. Moneymaker and traditional varieties Negro Yeste and Verdal (corresponding to results in table 2).

| A             |                 | Sucrose<br>(mg g <sup>-1</sup> fw) | Fructose<br>(mg g <sup>-1</sup> fw) | Glucose<br>(mg g <sup>-1</sup> fw) | Mannose            | UDP-<br>Glucose    | Citrate<br>(mg g <sup>-1</sup> fw) | Succinate           |
|---------------|-----------------|------------------------------------|-------------------------------------|------------------------------------|--------------------|--------------------|------------------------------------|---------------------|
| Genotype (G)  | Moneymaker      | 0.45 <sup>b</sup>                  | 8.25 <sup>a,b</sup>                 | 10.62 <sup>a</sup>                 | 13.72 <sup>b</sup> | 35.16 <sup>b</sup> | 0.76 <sup>b</sup>                  | 90.05 <sup>a</sup>  |
|               | Negro Yeste     | 0.92 <sup>a</sup>                  | 8.92 <sup>a</sup>                   | 12.04 <sup>a</sup>                 | 15.93 <sup>b</sup> | 40.31 <sup>b</sup> | 1.11 <sup>a</sup>                  | 107.83 <sup>a</sup> |
|               | Verdal          | 1.14 <sup>a</sup>                  | 7.26 <sup>b</sup>                   | 8.10 <sup>b</sup>                  | 22.52 <sup>a</sup> | 50.81 <sup>a</sup> | 0.71 <sup>b</sup>                  | 41.47 <sup>b</sup>  |
|               | <i>P</i> -Value | ***                                | *                                   | ***                                | **                 | ***                | ***                                | ***                 |
| Condition (C) | Control         | 0.30 <sup>b</sup>                  | 8.30                                | 10.28                              | 12.97 <sup>b</sup> | 40.64              | 0.75 <sup>b</sup>                  | 56.00 <sup>b</sup>  |
|               | Salt Stress     | 1.37 <sup>a</sup>                  | 7.98                                | 10.23                              | 21.81 <sup>a</sup> | 43.54              | 0.97 <sup>a</sup>                  | 103.57 <sup>a</sup> |
|               | <i>P</i> -Value | ***                                | n.s.                                | n.s.                               | ***                | n.s.               | ***                                | ***                 |
| Interaction   | G x C           | **                                 | n.s.                                | *                                  | ***                | *                  | *                                  | **                  |

| B             |                 | Fumarate            | Malate<br>(mg g <sup>-1</sup> fw) | Formate             | Glutamate<br>(mg g <sup>-1</sup> fw) | Formate /<br>succinate | Glutamate /<br>succinate |
|---------------|-----------------|---------------------|-----------------------------------|---------------------|--------------------------------------|------------------------|--------------------------|
| Genotype (G)  | Moneymaker      | 4.46 <sup>a,b</sup> | 1.80 <sup>a</sup>                 | 2.06 <sup>a,b</sup> | 0.23 <sup>b</sup>                    | 0.04 <sup>a,b</sup>    | 4.16 <sup>b</sup>        |
|               | Negro Yeste     | 5.18 <sup>a</sup>   | 1.54 <sup>b</sup>                 | 1.37 <sup>b</sup>   | 0.26 <sup>b</sup>                    | 0.01 <sup>b</sup>      | 2.36 <sup>b</sup>        |
|               | Verdal          | 3.52 <sup>b</sup>   | 0.97 <sup>c</sup>                 | 2.52 <sup>a</sup>   | 0.40 <sup>a</sup>                    | 0.06 <sup>a</sup>      | 9.52 <sup>a</sup>        |
|               | <i>P</i> -Value | *                   | ***                               | **                  | **                                   | **                     | ***                      |
| Condition (C) | Control         | 4.87 <sup>a</sup>   | 1.46                              | 1.78                | 0.20 <sup>b</sup>                    | 0.04                   | 4.93                     |
|               | Salt Stress     | 3.90 <sup>b</sup>   | 1.42                              | 2.18                | 0.39 <sup>a</sup>                    | 0.03                   | 5.77                     |
|               | <i>P</i> -Value | *                   | n.s.                              | n.s.                | ***                                  | n.s.                   | n.s.                     |
| Interaction   | G x C           | *                   | *                                 | *                   | *                                    | *                      | ***                      |

| C             |                 | Phytoene          | β-carotene        | Lutein            | Chlorophyll a      | Chlorophyll b      | Chlorophyll /<br>carotenoid |
|---------------|-----------------|-------------------|-------------------|-------------------|--------------------|--------------------|-----------------------------|
| Genotype (G)  | Moneymaker      | 2.36 <sup>c</sup> | 1.22 <sup>b</sup> | 0.88 <sup>c</sup> | 17.41 <sup>c</sup> | 5.67 <sup>c</sup>  | 4.69 <sup>b</sup>           |
|               | Negro Yeste     | 5.57 <sup>a</sup> | 1.70 <sup>a</sup> | 2.00 <sup>a</sup> | 37.87 <sup>a</sup> | 13.56 <sup>a</sup> | 5.28 <sup>a</sup>           |
|               | Verdal          | 3.67 <sup>b</sup> | 1.72 <sup>a</sup> | 1.28 <sup>b</sup> | 31.90 <sup>b</sup> | 11.86 <sup>b</sup> | 5.38 <sup>a</sup>           |
|               | <i>P</i> -Value | ***               | **                | ***               | ***                | ***                | *                           |
| Condition (C) | Control         | 3.23 <sup>b</sup> | 1.42 <sup>b</sup> | 0.86 <sup>b</sup> | 21.79 <sup>b</sup> | 7.80 <sup>b</sup>  | 5.28                        |
|               | Salt Stress     | 4.50 <sup>a</sup> | 1.67 <sup>a</sup> | 1.92 <sup>a</sup> | 36.33 <sup>a</sup> | 12.92 <sup>a</sup> | 4.95                        |
|               | <i>P</i> -Value | ***               | *                 | ***               | ***                | ***                | n.s.                        |
| Interaction   | G x C           | *                 | *                 | *                 | ***                | ***                | n.s.                        |

Effect of the genotype and salt stress condition on metabolite contents in ripe fruit of commercial cv. Moneymaker and traditional varieties Negro Yeste and Verdal (corresponding to results in table 2).

| A             |                 | Sucrose<br>(mg g <sup>-1</sup> fw) | Fructose<br>(mg g <sup>-1</sup> fw) | Glucose<br>(mg g <sup>-1</sup> fw) | Mannose            | UDP-<br>Glucose      | Citrate<br>(mg g <sup>-1</sup> fw) | Succinate           |
|---------------|-----------------|------------------------------------|-------------------------------------|------------------------------------|--------------------|----------------------|------------------------------------|---------------------|
| Genotype (G)  | Moneymaker      | 0.05 <sup>b</sup>                  | 8.41 <sup>b</sup>                   | 12.02 <sup>a,b</sup>               | 32.03 <sup>b</sup> | 24.28 <sup>b</sup>   | 1.01 <sup>a</sup>                  | 101.60 <sup>a</sup> |
|               | Negro Yeste     | 0.18 <sup>b</sup>                  | 10.36 <sup>a</sup>                  | 13.28 <sup>a</sup>                 | 31.59 <sup>b</sup> | 20.36 <sup>a,b</sup> | 1.12 <sup>a</sup>                  | 95.10 <sup>a</sup>  |
|               | Verdal          | 0.46 <sup>a</sup>                  | 8.88 <sup>b</sup>                   | 10.56 <sup>b</sup>                 | 55.43 <sup>a</sup> | 30.56 <sup>a</sup>   | 0.59 <sup>b</sup>                  | 35.00 <sup>b</sup>  |
|               | <i>P</i> -Value | ***                                | ***                                 | ***                                | ***                | *                    | ***                                | **                  |
| Condition (C) | Control         | 0.07 <sup>b</sup>                  | 8.60 <sup>b</sup>                   | 10.42 <sup>b</sup>                 | 36.43              | 25.32                | 0.912                              | 84.44               |
|               | Salt Stress     | 0.38 <sup>a</sup>                  | 9.83 <sup>a</sup>                   | 13.48 <sup>a</sup>                 | 42.94              | 24.81                | 0.907                              | 69.99               |
|               | <i>P</i> -Value | ***                                | ***                                 | ***                                | n.s.               | n.s.                 | n.s.                               | n.s.                |
| Interaction   | G x C           | **                                 | *                                   | *                                  | *                  | *                    | **                                 | *                   |

| B             |                 | Fumarate          | Malate<br>(mg g <sup>-1</sup> fw) | Formate            | Glutamate<br>(mg g <sup>-1</sup> fw) | Formate /<br>succinate | Glutamate /<br>succinate |
|---------------|-----------------|-------------------|-----------------------------------|--------------------|--------------------------------------|------------------------|--------------------------|
| Genotype (G)  | Moneymaker      | 3.18 <sup>a</sup> | 1.09 <sup>b</sup>                 | 1.50 <sup>b</sup>  | 1.30 <sup>b</sup>                    | 0.02 <sup>b</sup>      | 13.48 <sup>b</sup>       |
|               | Negro Yeste     | 1.42 <sup>b</sup> | 1.47 <sup>a</sup>                 | 1.31 <sup>b</sup>  | 1.75 <sup>a,b</sup>                  | 0.02 <sup>b</sup>      | 22.45 <sup>b</sup>       |
|               | Verdal          | 0.70 <sup>b</sup> | 0.48 <sup>c</sup>                 | 16.90 <sup>a</sup> | 2.25 <sup>a</sup>                    | 0.61 <sup>a</sup>      | 72.67 <sup>a</sup>       |
|               | <i>P</i> -Value | ***               | ***                               | ***                | **                                   | **                     | ***                      |
| Condition (C) | Control         | 2.10              | 1.16 <sup>a</sup>                 | 3.84 <sup>b</sup>  | 1.69                                 | 0.11                   | 30.30                    |
|               | Salt Stress     | 1.43              | 0.87 <sup>b</sup>                 | 9.30 <sup>a</sup>  | 1.85                                 | 0.32                   | 42.11                    |
|               | <i>P</i> -Value | n.s.              | **                                | ***                | n.s.                                 | n.s.                   | n.s.                     |
| Interaction   | G x C           | *                 | *                                 | ***                | *                                    | *                      | *                        |

| C             |                 | Phytoene          | β-carotene        | Lycopene            | Lutein            | Chlorophyll<br>a   | Chlorophyll<br>b  |
|---------------|-----------------|-------------------|-------------------|---------------------|-------------------|--------------------|-------------------|
| Genotype (G)  | Moneymaker      | 6.17 <sup>a</sup> | 2.94 <sup>b</sup> | 64.48 <sup>b</sup>  | 0.30 <sup>b</sup> | ND <sup>c</sup>    | ND <sup>c</sup>   |
|               | Negro Yeste     | 2.54 <sup>b</sup> | 6.12 <sup>a</sup> | 120.69 <sup>a</sup> | 1.74 <sup>a</sup> | 21.72 <sup>a</sup> | 6.17 <sup>a</sup> |
|               | Verdal          | 1.34 <sup>c</sup> | 1.04 <sup>c</sup> | ND <sup>c</sup>     | 0.50 <sup>b</sup> | 15.03 <sup>b</sup> | 5.93 <sup>a</sup> |
|               | <i>P</i> -Value | ***               | ***               | ***                 | ***               | ***                | ***               |
| Condition (C) | Control         | 2.78 <sup>b</sup> | 3.46              | 52.44 <sup>b</sup>  | 0.65 <sup>b</sup> | 9.34 <sup>b</sup>  | 3.10 <sup>b</sup> |
|               | Salt Stress     | 3.92 <sup>a</sup> | 3.27              | 71.02 <sup>a</sup>  | 1.04 <sup>a</sup> | 15.16 <sup>a</sup> | 4.96 <sup>a</sup> |
|               | <i>P</i> -Value | ***               | n.s.              | ***                 | ***               | ***                | ***               |
| Interaction   | G x C           | ***               | *                 | **                  | *                 | **                 | **                |

| D             |                 | Chlorophyll /<br>carotenoid |
|---------------|-----------------|-----------------------------|
| Genotype (G)  | Moneymaker      | 0.00 <sup>b</sup>           |
|               | Negro Yeste     | 0.20 <sup>b</sup>           |
|               | Verdal          | 4.26 <sup>a</sup>           |
|               | <i>P</i> -Value | ***                         |
| Condition (C) | Control         | 1.74 <sup>a</sup>           |
|               | Salt Stress     | 1.24 <sup>b</sup>           |
|               | <i>P</i> -Value | **                          |
| Interaction   | G x C           | ***                         |

Metabolites contents are presented as μg g<sup>-1</sup> fresh weigh (fw) unless otherwise stated in the table. Different letters in each principal factor indicate statistically significant differences at  $P < 0.05$  (Tukey's test). \*, \*\* and \*\*\* indicates significant differences at  $P \leq 0.05$ ,  $P \leq 0.01$  and  $P \leq 0.001$  respectively for each principal factor and the interaction. n.s. = no significance.
